# Supplementary material for: Identification of Macrophage Genotype and Key Biological Pathways in Circulating Angiogenic Cell Transcriptome
Source: PubMed Central journal article supplement (PMC6525806; doi:10.1155/2019/9545261), 2019-05-02

## Supplementary data file

### GSE 2040 microarray dataset

**Experiment:** Human endothelial progenitor cells (EPC) vs. human umbilical vein endothelial cells (HUVEC) vs. CD14+ monocytes

**Data used in the present article:**

3 samples of EPC

3 samples of CD 14+ monocytes

The HUCEX data was omitted.

**Microarray characteristics:**

HG-U95Av2 microarray (Affymetrix Inc.)

Targets 9,670 human genes as selected from the National Center for Biotechnology Information (NCBI) Gene Bank database with a total of 12,000 oligonucleotide sets.

**Normalization method:** Raw expression data were normalized using GCRMA

**Box-and-whisker plot**

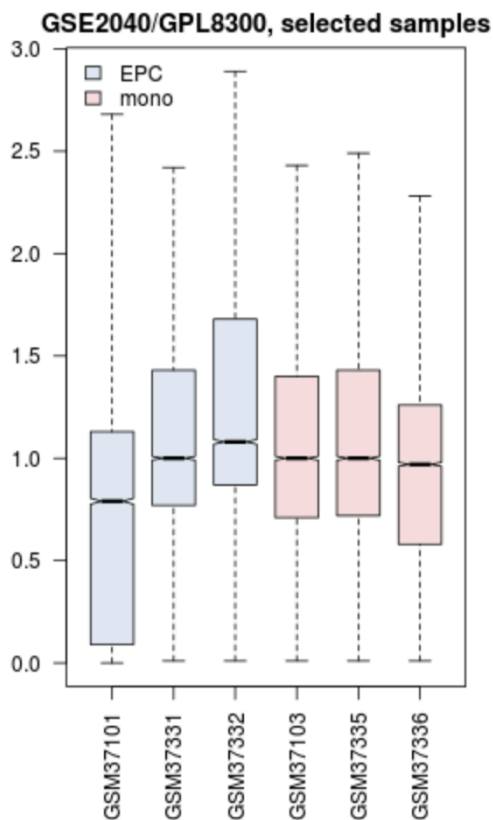

# Volcano plot

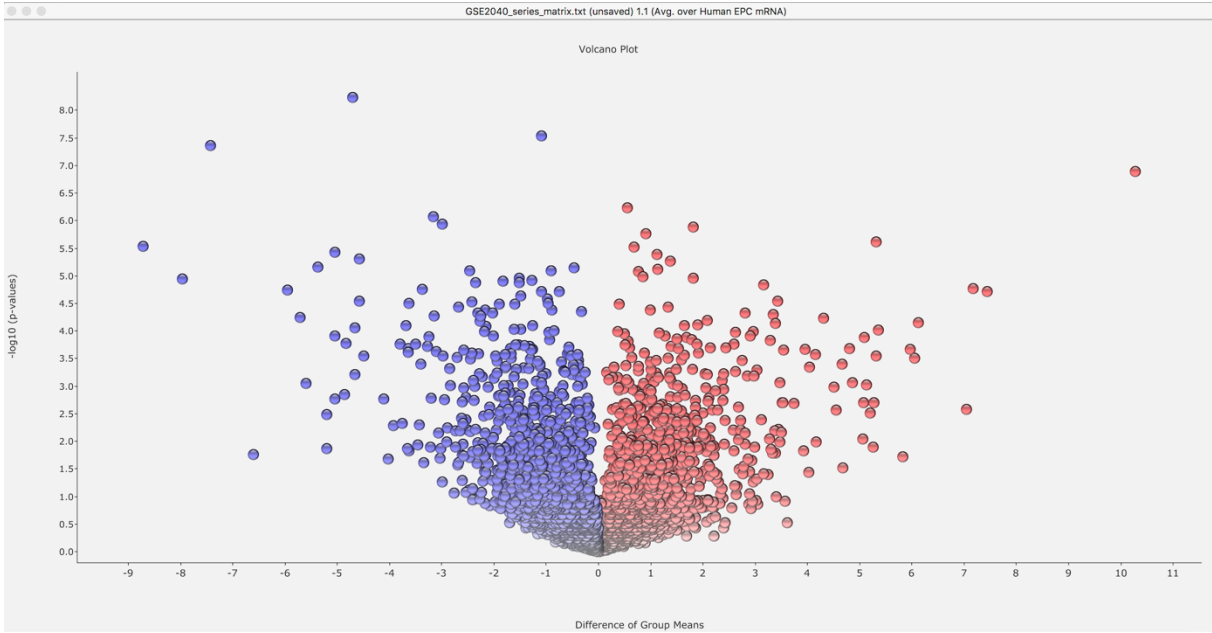

## GSE 5099 microarray dataset

**Experiment:** Expression Data from Macrophage Maturation and Polarization Experiment

**Cell type:** Freshly isolated human monocytes were cultured in the presence of M-CSF (100 ng/ml) for 7 days, and then activated. The study includes Monocytes at day 0, macrophages at day 3 and 7, Interferon Gamma and LPS treated macrophages and IL-4 treated macrophages.

**Microarray characteristics:**

HG-U133: Affymetrix Human Genome U133 Array, 2 arrays with a total of 44928 entries.

**Normalization method:** Raw expression data were normalized using GCRMA

**Box-and-whisker plot**

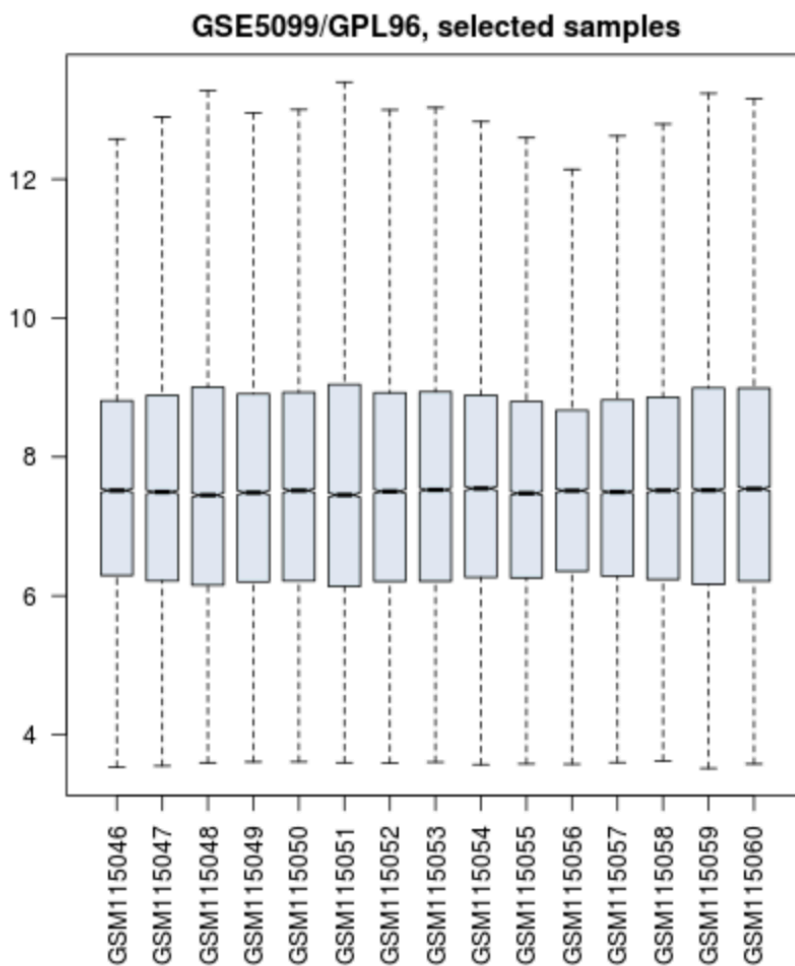

## Volcano plot

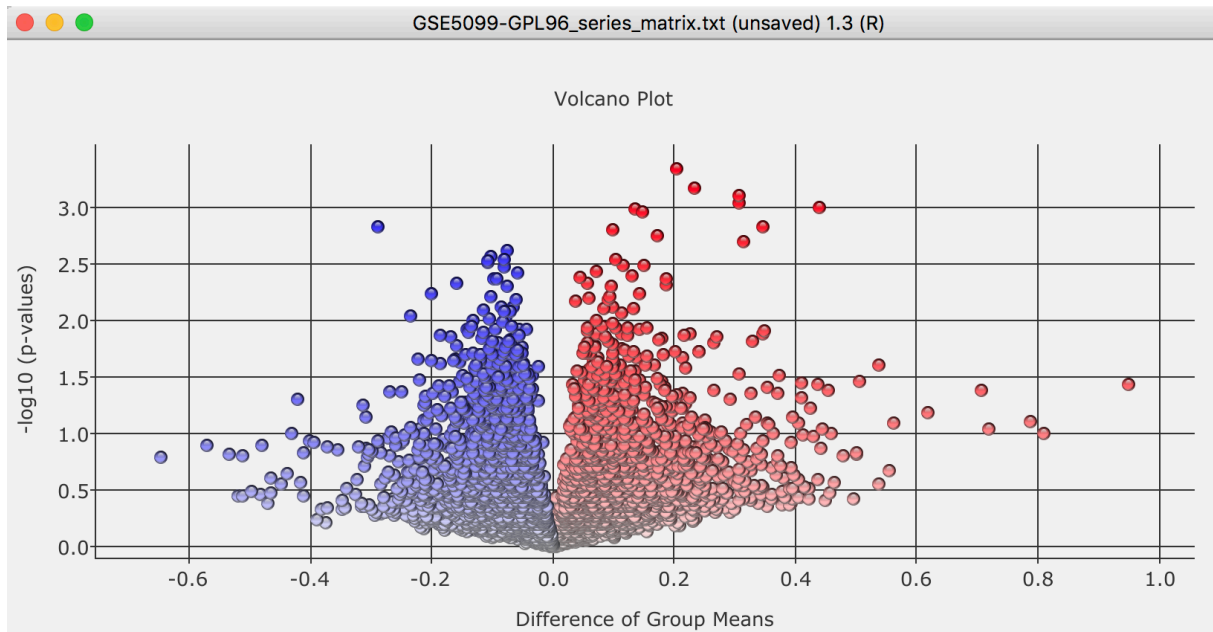

Supplement: 9545261.f1.pdf [file 9545261.f1.pdf]
